1 **Insights into the salivary *N*-glycome of *Lutzomyia longipalpis*, vector of visceral**  
2 **leishmaniasis**

3

4 Karina Mondragon-Shem<sup>1+</sup>, Katherine Wongtrakul-Kish<sup>2+#</sup>, Radoslaw P. Kozak<sup>2</sup>, Shi Yan<sup>3</sup>, Iain  
5 Wilson<sup>3</sup>, Katharina Paschinger<sup>3</sup>, Matthew E. Rogers<sup>4</sup>, Daniel I. R. Spencer<sup>2</sup>, Alvaro Acosta-  
6 Serrano<sup>1\*</sup>

7 <sup>1</sup>Department of Vector Biology, Liverpool School of Tropical Medicine, Liverpool L3 5QA, UK.

8 <sup>2</sup>Ludger Ltd., Culham Science Centre, Oxfordshire OX14 3EB, UK.

9 <sup>3</sup> Department of Chemistry, University of Natural Resources and Life Sciences, 1190 Vienna,  
10 Austria.

11 <sup>4</sup>Department of Disease Control. London School of Hygiene and Tropical Medicine. London,  
12 WC1E 7HT. UK.

13

14 <sup>+</sup> These authors contributed equally to this work

15

16 <sup>#</sup>Current address: Australian Research Council Centre of Excellence for Nanoscale Biophotonics,  
17 Macquarie University, Sydney, Australia

18

19 <sup>\*</sup>Corresponding author: [alvaro.acosta-serrano@lstmed.ac.uk](mailto:alvaro.acosta-serrano@lstmed.ac.uk)

20

21

22

23

24 **Abstract**

25 During *Leishmania* transmission sand flies inoculate parasites and saliva into the skin of  
26 vertebrates. Saliva has anti-haemostatic and anti-inflammatory activities that evolved to facilitate  
27 bloodfeeding, but also modulate the host's immune responses. Sand fly salivary proteins have  
28 been extensively studied, but the nature and biological roles of protein-linked glycans remain  
29 overlooked. Here, we characterised the profile of *N*-glycans from the salivary glycoproteins of  
30 *Lutzomyia longipalpis*, vector of visceral leishmaniasis in the Americas. *In silico* predictions  
31 suggest half of *Lu. longipalpis* salivary proteins may be *N*-glycosylated. SDS-PAGE coupled to LC-  
32 MS analysis of sand fly saliva, before and after enzymatic deglycosylation, revealed several  
33 candidate glycoproteins. To determine the diversity of *N*-glycan structures in sand fly saliva,  
34 enzymatically released sugars were fluorescently tagged and analysed by HPLC, combined with  
35 highly sensitive LC-MS/MS, MALDI-TOF-MS, and exoglycosidase treatments. We found that the  
36 *N*-glycan composition of *Lu. longipalpis* saliva mostly consists of oligomannose sugars, with  
37 Man<sub>5</sub>GlcNAc<sub>2</sub> being the most abundant, and a few hybrid-type species. Interestingly, some  
38 glycans appear modified with a group of 144 Da, whose identity has yet to be confirmed. Our  
39 work presents the first detailed structural analysis of sand fly salivary glycans.

40

41

42

43

44

45

## 46 Introduction

47 Sand flies are small insects that can transmit bacteria and viruses<sup>1,2</sup>, but are known mainly as  
48 vectors of leishmaniasis, a disease that threatens 350 million people worldwide<sup>3</sup>. When female  
49 sand flies feed, they inject a saliva comprised of molecules that facilitate the ingestion of blood,  
50 and modulate the host immune system and pathogen transmission<sup>4,5,6</sup>. These effects have led  
51 researchers to explore the potential of insect salivary molecules as markers of biting exposure<sup>5,7</sup>  
52 (to determine risk of disease), or even as components of vaccines against leishmaniasis<sup>8</sup>. Of the  
53 many types of molecules that make up saliva, most research has focused on the proteins; here,  
54 we have investigated the glycans that modify these proteins.

55 In most eukaryotic cells, the addition of glycans to proteins is a highly conserved and diverse post-  
56 translational modification. The most common types of protein-linked glycans are *N*-linked  
57 (attached to asparagine residues in the sequon Asn-X-Thr/Ser), and *O*-linked (attached to serine  
58 or threonine residues). Glycoconjugates display a wide range of biological roles, from organism  
59 development to immune system functions against pathogens<sup>9</sup>. One study has addressed the  
60 types and roles of glycans in insects using the model fruit fly, *Drosophila melanogaster*. In this  
61 species, biological functions have been attributed to different glycan classes, such as morphology  
62 and locomotion (*N*-linked glycans), or cell interaction and signalling (*O*-linked glycans)<sup>10</sup>.

63 Glycans may have special relevance in the saliva of medically important arthropods, because of  
64 the fundamental role this biological fluid plays during pathogen transmission. For instance,  
65 African trypanosomes, tick-borne pathogens, arboviruses and malaria are all harboured in the  
66 salivary glands of their respective vectors, and are co-transmitted with saliva through the bite. In  
67 contrast, *Leishmania* parasites are transmitted by regurgitation from the fly's midgut, where  
68 infectious stages reside, and contact with saliva occurs in the host at the bite site<sup>11</sup>. People living  
69 in leishmaniasis-endemic regions are constantly exposed to the saliva of uninfected sand flies,  
70 triggering immune responses that may later influence parasite infection<sup>12</sup>. The immunogenicity  
71 of salivary glycan structures and their interaction with specific immune cells could have different  
72 effects for each disease.

73 There are some reports describing the presence of salivary glycoproteins in sand flies through *in*  
74 *silico* and blotting analyses<sup>13-19</sup>; however, to our knowledge no detailed structural studies have  
75 been published to date. Therefore, we set out to identify the salivary glycoproteins in the sand fly  
76 vector species *Lutzomyia longipalpis*, and structurally characterise their *N*-glycan conjugates. We  
77 further discuss their implications for insect bloodfeeding as well as vector-host interactions.

78

## 79 Results

### 80 Identification of *Lutzomyia longipalpis* salivary glycoproteins.

81 To determine the degree of *N*-glycosylation, an *in silico* analysis was carried out on 42 salivary  
82 proteins previously reported in *Lu. longipalpis*<sup>4,20</sup> to predict protein *N*-glycosylation sites using the  
83 NetNGlyc server (<http://www.cbs.dtu.dk/services/NetNGlyc/>). This revealed 48% of the  
84 commonly known salivary proteins contain conventional *N*-glycosylation sites (Supplementary

85 Table S1). However, it is important to note this list only includes proteins available on the NCBI  
86 database as studies published to date have focused on major secreted proteins, and no deep  
87 sequencing has been carried out for salivary glands of this sand fly species.

88

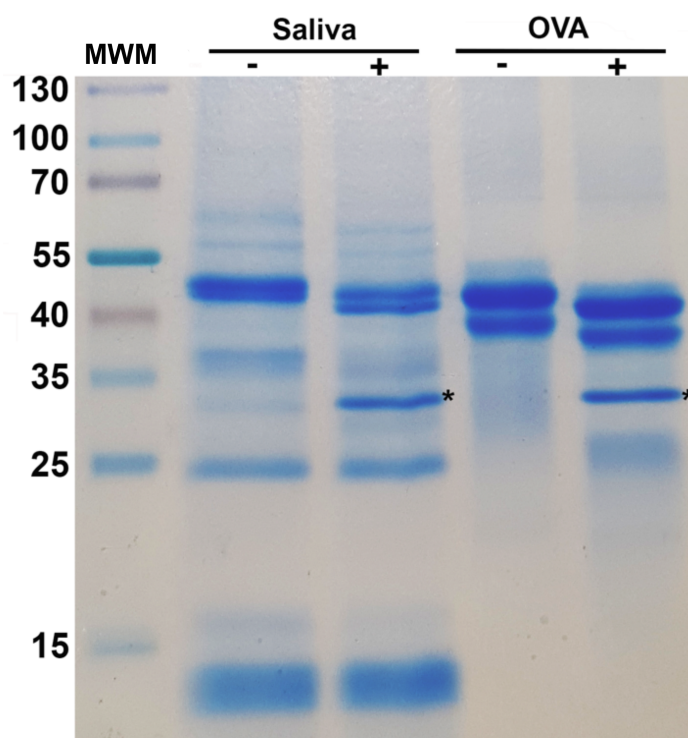

89

90 **Figure 1. Enzymatic cleavage of *Lu. longipalpis* salivary glycoproteins with PNGase F.** 10 µg of salivary  
91 proteins were incubated overnight with (+) and without (-) PNGase F to cleave *N*-glycans. Samples were  
92 resolved on a 12 % SDS-PAGE gel and Coomassie-stained. Egg albumin (OVA) was used as a positive control.  
93 MWM, molecular weight marker. \*PNGase F enzyme.

94

95 To accompany the *in silico* dataset, we carried out our own analysis of the sand fly salivary  
96 proteins (Supplementary Fig. S1). First, *Lu. longipalpis* salivary glands were dissected and  
97 individually pierced to release saliva. Subsequent Coomassie blue SDS-PAGE analysis showed  
98 several protein bands ranging from ~10-100 kDa (Fig. 1). To identify which proteins were  
99 glycosylated, samples were analysed before and after treatment with Peptide-N-Glycosidase F  
100 (PNGase F), which cleaves high-mannose, hybrid and complex *N*-linked glycans. Treatment with  
101 PNGase F resulted in molecular mass shifts and migration of several protein bands, consistent  
102 with the widespread removal of *N*-glycans from the salivary glycoproteins (Fig. 1). De-  
103 glycosylation was also confirmed by transferring proteins to PVDF membrane and blotting with  
104 Concanavalin A (ConA) lectin, which binds specifically to terminal mannose residues on  
105 glycoproteins<sup>21</sup> (Supplementary Fig. S2).

106 For LC-MS/MS based glycoprotein identification, the major deglycosylated protein bands  
107 (Supplementary Fig. S3) were excised from the gel and sent to the University of Dundee  
108 Fingerprints Proteomics Facility. From the resulting list of 191 identified proteins, we excluded

109 those without recognizable glycosylation sequons (as determined by NetNGlyc), obtaining a final  
110 list of 43 potentially *N*-glycosylated protein candidates (Supplementary Table S2). Fourteen of  
111 these potential glycoproteins were also identified in our initial *in silico* analysis (Supplementary  
112 Table S1), including LJM11, LJM11 and LJM143, which have been proposed as potential vaccine  
113 components against *Leishmania* infection<sup>4</sup>. Using the InterProScan tool to identify conserved  
114 protein domains, family distributions (Supplementary Fig. S4) show five of the candidates  
115 belonging to the actin family, while others like tubulin, 5' nucleotidase, peptidase M17 and the  
116 major royal jelly protein (yellow protein) are represented by two proteins each. After Blast2GO  
117 analysis, the "molecular function breakdown" suggested that 44% of the candidate glycoproteins  
118 are involved in binding, including 'small molecule binding' and 'carbohydrate derivative binding'  
119 (Supplementary Fig. S4). We also used the DeepLoc server to predict protein subcellular  
120 localisation and solubility of the proteins identified in Table S2. The results suggest 85% of  
121 candidate glycoproteins are soluble, and 10 proteins are both extracellular and soluble  
122 (Supplementary Table S2).

123

#### 124 Salivary glycoproteins from *Lu. longipalpis* are mainly modified with mannosylated *N*-glycans

125 Next, we determined the *N*-glycome modifying the salivary proteins of *Lu. longipalpis*. The  
126 presence of mannosylated *N*-glycan structures on salivary glycoproteins was suggested by the  
127 results of a lectin blot using Concanavalin A, and to confirm these results, we next determined  
128 the *N*-glycome of salivary glycoproteins of *Lu. longipalpis*.

129 The oligosaccharides were released by PNGase F followed by derivatization with procainamide<sup>22</sup>  
130 which allowed fluorescence detection following hydrophilic interaction liquid chromatography  
131 (HILIC) and provided increased signal intensity in MS and MS/MS analysis<sup>22</sup>. Overall, we identified  
132 14 different structures (Table 1), elucidated from ten separate compositions due to the presence  
133 of isomeric glycans.

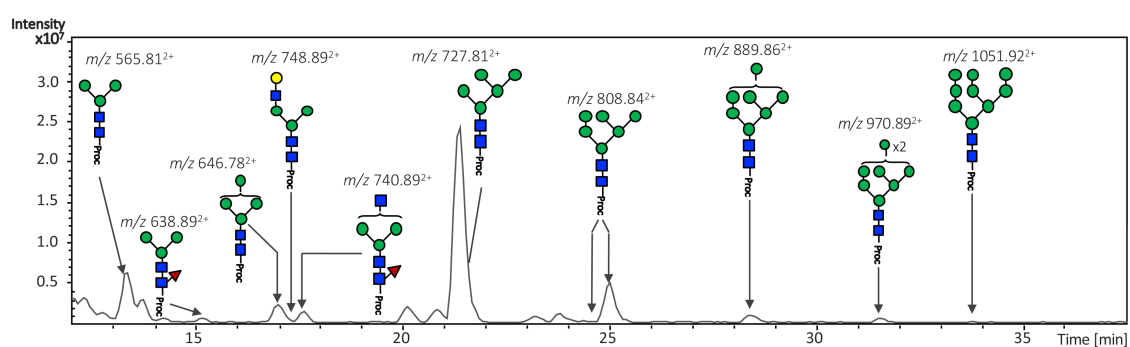

134

135 **Figure 2. HILIC-LC separation of procainamide labelled *N*-glycans from *Lu. longipalpis*.** Sand fly saliva  
136 contains mainly oligomannose-type *N*-linked glycans, with Man<sub>5</sub>GlcNAc<sub>2</sub> being the most abundant structure.  
137 Green circle, mannose; yellow circle, galactose; Blue square, N-Acetylglucosamine; red triangle, fucose;  
138 Proc, procainamide.

139

140 Most oligosaccharides are of the high mannose type (82% of the *N*-glycome), with the  
141 Man<sub>5</sub>GlcNAc<sub>2</sub>-Proc glycan with  $m/z$  [727.81]<sup>2+</sup>, being the most abundant species (21.16 min; GU

142 6.00, Fig. 2). In addition, few hybrid-type species (with a retention time of 15.12-17.24 min) were  
 143 detected, containing either an  $\alpha$ 1-6 core fucose residue linked to the reducing GlcNAc or not  
 144 fucosylated, or a single terminal LacNAc motif (Fig. 2).

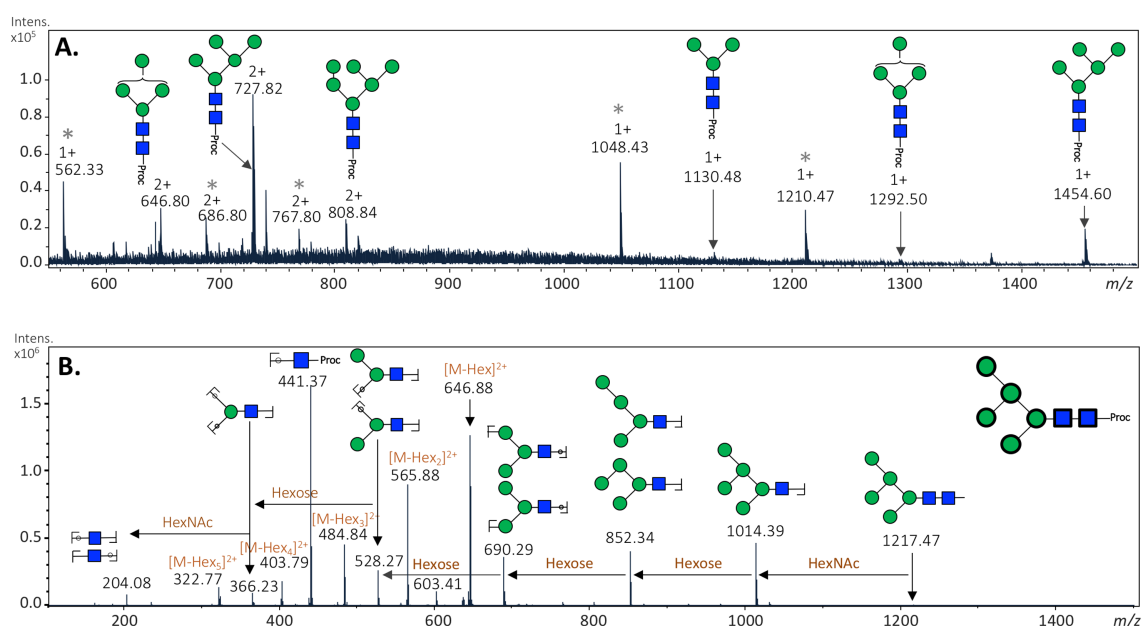

145

146 **Figure 3. Mass spectrometry analysis of released N-glycans from *Lu. longipalpis* salivary glycoproteins.** (A)  
 147 Positive-ion mass spectrum profile ( $m/z$  540-1,500) of total N-glycans. Ion signals are labelled accordingly.  
 148 The most abundant glycan species (Hex<sub>5</sub>HexNAc<sub>2</sub>-Proc) was also detected as an [M+H]<sup>2+</sup> ion with a  $m/z$  of  
 149 727.82. See Table 1 for complete glycan assignment. Peaks labelled with an asterisk correspond to glucose  
 150 homopolymer contaminants from HILIC. (B) Positive-ion MS/MS fragmentation spectrum for most  
 151 abundant  $m/z$  [727.82]<sup>2+</sup> corresponding to the composition Hex<sub>5</sub>HexNAc<sub>2</sub>-Proc, proposed as a Man<sub>5</sub>GlcNAc<sub>2</sub>.  
 152 Green circle, mannose; Blue square, N-Acetylglucosamine; Proc, procainamide.

153

154 All major glycan structures were characterised using positive ion MS (Fig. 3A) and MS/MS  
 155 fragmentation spectra. An example of structural elucidation using MS/MS fragmentation  
 156 spectrum is shown for the major glycan species Man<sub>5</sub>GlcNAc<sub>2</sub>-Proc, with  $m/z$  [727.82]<sup>2+</sup> (Fig. 3B)  
 157 while the remaining are mainly represented by hybrid-type glycans, either a trimannosyl modified  
 158 with a Fuc residue on the chitobiose core, or paucimannosidic structures containing an unknown  
 159 modification of 144 Da (see below).

160 Although PNGase F is highly effective in cleaving N-linked glycans, its activity is blocked by the  
 161 presence of core fucose residues with an  $\alpha$ 1-3 linkage found in non-mammalian glycans.  
 162 Therefore, we also treated our samples with PNGase A, which cleaves all glycans between the  
 163 innermost GlcNAc and the asparagine independent of core linkages<sup>23</sup>. No differences were  
 164 observed in chromatograms yielded from both enzymes (Supplementary Fig. S5), indicating all  
 165 core fucosylation is likely to be  $\alpha$ 1-6-linked.

166

167 MALDI-TOF-MS analysis reveals a series of sand fly salivary glycans with unidentified  
168 modifications of 144 Da

169 A more detailed analysis of the saliva by MALDI-TOF MS of pyridylaminated glycans revealed not  
170 only the major oligomannosidic species, but also suggested the existence of a series of glycans  
171 containing an unidentified structure. This modification was mainly found in two isomeric glycans:  
172 one with an RP-HPLC retention time of 25.0 min and the other of 26.5 min (Supplementary Fig.  
173 S6). The two isomers have a  $m/z$  1295.50, which corresponds to a pyridylaminated  $\text{Man}_4\text{GlcNAc}_2$   
174 glycan carrying a modification of 144 Da. This was confirmed by treatment with Jack bean  $\alpha$ -  
175 mannosidase, which resulted in a loss of 2 and 3 hexoses (Fig. 4) for each isomer, respectively.  
176 Interestingly, this modification seems to be located in different positions in the two structures,  
177 and in both cases this modification was lost after treatment with 48% aqueous hydrofluoric acid  
178 (aq.HF) (Fig. 4, and Table 2).

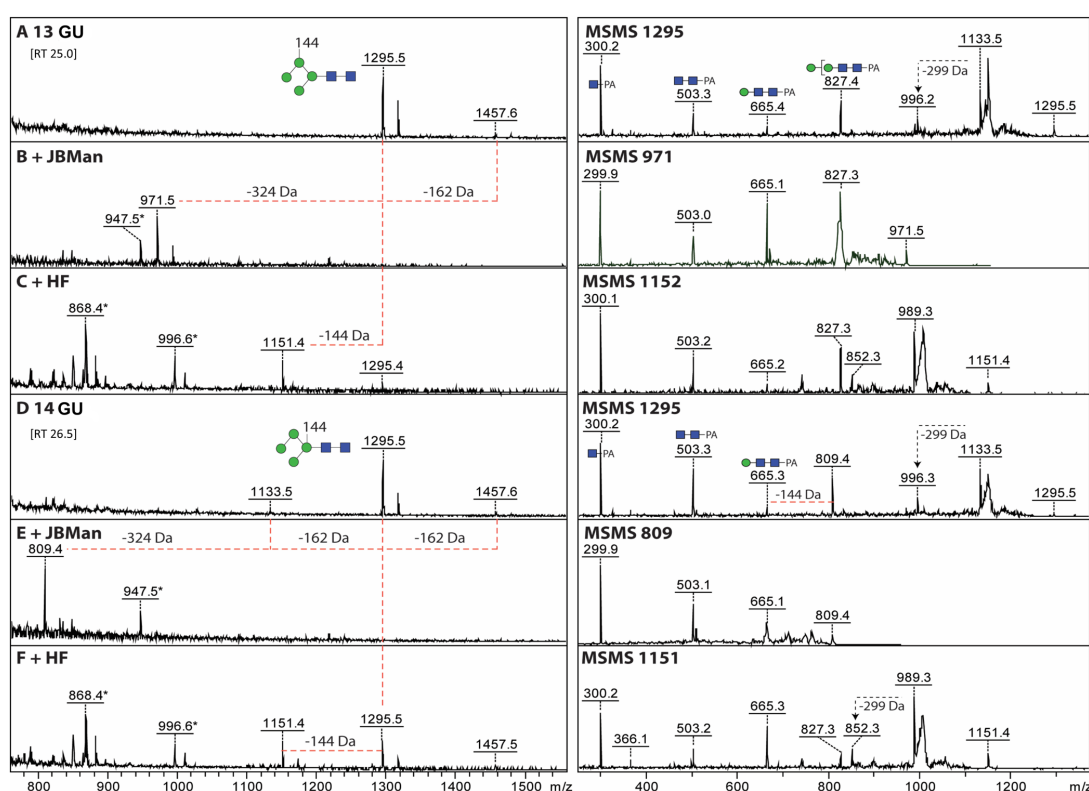

179

180 **Figure 4. Analysis of sand fly N-glycans with an unknown residue.** Two late-eluting RP-amide fractions (13  
181 and 14 GU) containing glycans of  $m/z$  1133, 1295 and 1457 (A, D) were analysed by MALDI-TOF MS and  
182 MS/MS before and after jack bean  $\alpha$ -mannosidase (B, E) or hydrofluoric acid (C, F) treatments. The  $m/z$   
183 1295 glycan structures lost either two or three mannose residues after mannosidase treatment, ruling out  
184 that terminal  $\alpha$ -mannose residues are substituted, but indicating a difference in the isomeric structure. In  
185 contrast, upon hydrofluoric acid treatment, incomplete loss of 144 Da was observed. Changes in mass upon  
186 mannosidase or HF treatment are indicated and non-glycan impurities annotated with an asterisk. The  
187 MS/MS for the original glycans and their digestion products are shown on the right; the differences in  
188 relative intensity of the  $m/z$  665 and 827 fragments could explain the isomeric  $m/z$  1295 structures with  
189 the 144 Da moiety attached to different mannose residues (as shown in panels A and D); key fragments are  
190 annotated according to the Symbolic Nomenclature for Glycans, while loss of reducing terminal GlcNAc-PA

191 is indicated by -299 Da. PA, 2-aminopyridine; GU, glucose units; green circle, mannose; blue square, N-  
192 Acetylglucosamine.

193 Susceptibility to aq.HF is a hallmark of phosphoester, galactofuranose and some fucose  
194 modifications, but none of these are obviously compatible with a 144 Da modification. Based on  
195 this data, a re-assessment of the data with the procainamide-labelled glycans also revealed a  
196 potential oligosaccharide with a 144 Da modification (Supplementary Fig. S7); however, due to  
197 the very low abundance of these glycans we were unable to determine their chemical nature.  
198 Additionally, the potential for anionic modifications of *N*-glycans was explored by both glycomic  
199 workflows, but limitations in spectral quality and sample amount prevented a definitive  
200 characterisation.

#### 201 **No O-linked glycans in sand fly saliva?**

202 *In silico* predictions using the NetOGlyc 4.0<sup>24</sup> server suggest that 85% our 191 identified salivary  
203 proteins have putative *O*-glycosylation sites (Supplementary Table S3). Sand fly saliva was  
204 subjected to reductive  $\beta$ -elimination to release *O*-glycans from the de-*N*-glycosylated proteins.  
205 Separation using porous graphitized carbon chromatography coupled with negative ion mode ESI-  
206 MS did not detect any *O*-glycans in the sample (Supplementary Fig. S8), either due to their  
207 absence, low abundance or low mass.

208

#### 209 **Discussion**

210 Sand fly saliva has important implications both for the insect and the vertebrate host<sup>4</sup>. *Lu.*  
211 *longipalpis* salivary proteins and their biological roles have been well studied<sup>4,20</sup>; however, the  
212 sugars that modify these proteins have not been characterised in detail. Most work on sand fly  
213 salivary glycans comes from *in silico* analyses<sup>13-15,17,18,25</sup> and lectin blotting. They were first  
214 reported by Volf et al<sup>19</sup>, who used lectins to detect mannosylated *N*-type glycans. Mejia et al<sup>16</sup>  
215 reported high mannose glycans in *Lu. longipalpis* saliva, with some potential hybrid-type  
216 structures (also based on lectin specificity). However, results from lectin-based methods should  
217 be interpreted with care as detection controls have not always been included in these studies,  
218 and results can be highly dependent on glycan abundance in samples and specific protocols. Our  
219 work is the first time that a mass spectrometry approach has been used to study the salivary *N*-  
220 linked glycans of *Lu. longipalpis*, providing detailed information about their structures and relative  
221 abundances. We found that sand fly salivary glycoproteins consist mainly of oligomannose glycans  
222 (ranging from the core Man<sub>3</sub>GlcNAc<sub>2</sub> to Man<sub>9</sub>GlcNAc<sub>2</sub>), with some hybrid-type (e.g. fucosylated)  
223 structures. Additionally, this is the first report of a 144 Da (unknown) modification present in  
224 some salivary glycans. Our results provide new insights into how these structures could be  
225 recognised by vertebrate host cells.

226 In insects, protein glycosylation studies have been carried out primarily on the *Drosophila*  
227 *melanogaster* fly, demonstrating the presence of various carbohydrate structures<sup>10,26,27</sup>. It is  
228 generally accepted that *N*-linked type glycoproteins in arthropods are mainly of the high-  
229 mannose or paucimannose type, and account for over 90% of glycan complexity in *Drosophila*<sup>10,28</sup>.  
230 One of the first indications of the capacity of insects to produce complex type *N*-glycans came



231 from bee venom phospholipase A2, which contains the core  $\alpha$ 1,3-fucose (an IgE epitope  
232 allergenic to humans). Anionic and zwitterionic *N*-glycans with up to three antennae have more  
233 recently been found in a range of insects<sup>29-32</sup>. Furthermore, Vandenborre et al.<sup>33</sup> explored  
234 glycosylation differences comparing several economically important insects, and found  
235 glycoproteins to be involved in a broad range of biological processes such as cellular adhesion,  
236 homeostasis, communication and stress response.

237 Some researchers have predicted the presence of mucins in the mouthparts of bloodfeeders<sup>34,35</sup>,  
238 proposing their possible role as lubricants to facilitate bloodmeals. Even though *O*-linked glycans  
239 have been widely documented in invertebrates, we were unable to detect these sugars in sand  
240 fly saliva after reductive  $\beta$ -elimination. This was surprising given that our bioinformatic analysis  
241 (NetOGlyc server) predicted the presence of putative *O*-glycosylation sites. The presence of *O*-  
242 linked glycans in *Lu. longipalpis* saliva has been suggested through peanut agglutinin and *Vicia*  
243 *villosa* lectin detection<sup>16</sup>; however, it is worth noting that the experiment does not include  
244 positive controls or binding inhibition by competitive sugars, so non-specific binding cannot be  
245 ruled out. Interestingly, *Lu. longipalpis* midgut mucin-like glycoprotein has been described<sup>36</sup> (with  
246 a suggested role in *Leishmania* attachment), showing the capacity of this species to produce *O*-  
247 linked glycans (at least in other tissues). A variety of *O*-linked glycans are reported for *Drosophila*<sup>37</sup>,  
248 with important functions such as body development<sup>10,38</sup>. Furthermore, research shows that  
249 several *Drosophila*<sup>37</sup> and moth<sup>39</sup> cell lines form mucin-type *O*-glycans. It is worth noting there is  
250 no consensus sequence for *O*-glycosylation as in *N*-linked glycosylation, and *in silico* predictions  
251 are unreliable. Interestingly, similar results have been found in *Glossina* (unpublished), suggesting  
252 that these dipterans may not be able to *O*-glycosylate proteins in salivary tissues, or they are  
253 below the level of mass spectrometry detection.

254 A surprising finding in this work were the 144 Da structures modifying some of the salivary glycans  
255 (i.e. Man<sub>4</sub>GlcNAc<sub>3</sub>, and two Man<sub>4</sub>GlcNAc<sub>2</sub> isomers). They were present in very low abundance  
256 (<1%), were located on different mannose residues (as shown by jack bean  $\alpha$ -mannosidase  
257 digestion), and appeared susceptible to aqueous HF. However, we have yet to confirm the  
258 identity and biological role of this modification. A literature search revealed that structures of a  
259 144 Da mass have been found on glycans from other organisms, including bacteria, viruses and  
260 sea algae<sup>40-42</sup>, but were not further addressed by the authors. One possibility is that these  
261 correspond to an anhydrosugar, like 3,6-anhydrogalactose (of 144 Da mass)<sup>43</sup>. Interestingly, work  
262 on mosquitoes has shown that these insects are able to produce anionic glycans with sulphate  
263 and/or glucuronic modifications that can be tissue specific<sup>29,44</sup>. The glycans identified here  
264 carrying this rare 144 Da residue may be another example of such modifications and could play a  
265 role specific to their location in sand fly saliva.

266 Even though every effort was made during salivary gland dissections to obtain saliva with minimal  
267 tissue contamination, this cannot be completely avoided. Analysis with the DeepLoc server  
268 suggested that although most protein candidates are 'soluble', only some are predicted to be  
269 'extracellular'. Furthermore, some proteins without signal peptide can still be secreted through a  
270 non-classical or "unconventional" secretory pathway<sup>47,48</sup>. An alternative way of saliva extraction  
271 would be to induce salivation by chemical means like pilocarpine<sup>49-51</sup>; however, this carries its  
272 own logistical difficulties considering the amount of saliva needed to detect glycans in such low  
273 abundances (even with the highly sensitive techniques we have used here). Another limitation of

274 this work is the low protein profile resolution provided by 1D gel electrophoresis, where we may  
275 have missed weaker bands during our selection of proteins for sequencing. Higher protein  
276 concentrations and analysis through 2D gel electrophoresis could help us address this issue;  
277 nevertheless, we believe our work includes the major proteins in *Lu. longipalpis* saliva, providing  
278 a good overview of glycan abundance and composition in this bloodfeeding insect.

279 The biological role of protein glycosylation in the saliva of sand flies (and other bloodfeeding  
280 arthropods) is uncertain. One possibility is that glycans affect salivary protein half-life in the blood  
281 once they enter vertebrate host. Another possibility is that these glycans influence other *in vivo*  
282 processes like the interactions between saliva and cell surface carbohydrate recognition domains.  
283 For instance, the mannose receptor and DC-SIGN are c-type lectins that recognize mannosylated  
284 structures (uncommon in vertebrate cells); they are present on macrophages and dendritic cells,  
285 playing a role in both innate and adaptive immune systems<sup>52</sup>, making glycans highly relevant in  
286 parasitic infection processes. Additionally, the mannose-binding lectin activates the ‘lectin  
287 pathway’ of complement, and has an important role in protection against various pathogens<sup>53</sup>.  
288 An example of this was reported in tick saliva, which contains a mannose-binding lectin inhibitor  
289 whose activity was shown to be glycosylation-dependent<sup>54</sup>.

290 This, in turn, could be of importance within the context of *Leishmania* infection as both  
291 macrophages and dendritic cells have been shown to have critical roles in the initial stages of  
292 infection and subsequent dissemination of the parasite inside the vertebrate host<sup>55</sup>. In order for  
293 *Leishmania* to survive and multiply inside the host, it must be internalized by macrophages;  
294 however, promastigotes appear to avoid the MR receptor during invasion, as it promotes  
295 inflammation and can be detrimental to their survival<sup>55</sup>. The saliva of *Lu. longipalpis* can prevent  
296 macrophages from presenting *Leishmania* antigens to T cells<sup>56</sup>, but these effects are species-  
297 specific; in the case of other sand flies like *Phlebotomus papatasi*, saliva inhibits the activation of  
298 these cells<sup>57</sup>. Work on a patient-isolated *L. major* strain that causes nonhealing lesions in C57BL/6  
299 mice found that its uptake by dermal-macrophages is MR-mediated<sup>58</sup>. Even though the MR does  
300 not play a role in the healing strain, it is an indication that sand fly saliva may be involved in other  
301 parasite-macrophage interactions. *Leishmania* also interacts with DC-SIGN (particularly  
302 amastigotes and metacyclic promastigotes) and this varies depending on species<sup>59</sup>. It remains to  
303 be seen whether mannosylated glycoproteins in saliva impair or facilitate these interactions and  
304 their outcomes.

305 Many sand fly salivary proteins are currently being explored as potential vaccine candidates  
306 against *Leishmania*, and knowing the nature of their post-translational modifications is relevant  
307 to their activity and efficacy. Several salivary proteins from *Lu. longipalpis* that are being  
308 researched as vaccine candidates (e.g. LJM11, LJM17 and LJL143<sup>4</sup>) have potential glycosylation  
309 sites (as indicated in the results of our *in silico* analysis). As recombinant versions of these proteins  
310 are normally expressed in non-insect cells<sup>60</sup>, care should be taken to ensure the glycoprotein’s  
311 profile and activity remains the same.

312 Finally, it is also worth considering the role salivary glycoproteins could play inside the sand flies  
313 themselves. Both male and female sand flies rely on plant sugars to survive, and Cavalcante et al.  
314 showed that *Lu. longipalpis* ingest saliva while sugar feeding<sup>61</sup>. Lectins (which bind to glycans)  
315 represent a major part of a plant’s defence system<sup>62</sup>, and can cause damage to an insect’s midgut

316 when ingested<sup>63</sup>. Salivary glycoconjugates may be potentially recognized by these plant lectins,  
317 helping to decrease the damage they can cause. Moreover, the ingestion of saliva during the  
318 bloodmeal may impact parasite differentiation in the fly's gut<sup>64</sup>. Furthermore, sand fly-borne  
319 viruses use the host cell machinery for replication, which includes the insect glycosylation  
320 pathways, before it is transmitted to the vertebrate host. In this context, understanding the  
321 glycosylation of insect salivary glands is also relevant to understand their pathogenicity.

322

## 323 **Methods**

### 324 **Glycoprotein predictions**

325 The servers NetNGlyc 1.0<sup>65</sup> (<http://www.cbs.dtu.dk/services/NetNGlyc/>) and NetOGlyc 4.0<sup>24,66</sup>  
326 (<http://www.cbs.dtu.dk/services/NetOGlyc/>) were used to predict potential glycosylation sites by  
327 examination of the consensus sequences. The DeepLoc 1.0<sup>67</sup> server  
328 (<http://www.cbs.dtu.dk/services/DeepLoc/index.php>) was used to predict location of proteins.

329

### 330 **Sand fly salivary gland dissection and extraction of saliva**

331 *Lutzomyia longipalpis* sand flies were obtained from a colony at the London School of Hygiene  
332 and Tropical Medicine (UK), which originated in Jacobina (Bahia state), Brazil. Salivary glands were  
333 dissected from 5-day old, sugar-fed, uninfected females in sterile PBS (Sigma, St. Louis, US). To  
334 harvest saliva, pools of 10 salivary glands were placed on ice, pierced with a needle and then  
335 centrifuged at 3000 rpm for 10 min at 4°C. The supernatant (pure saliva) was stored at -80°C.  
336 Between 0.5-1 µg of protein per sand fly was obtained from dissections.

337

### 338 **SDS polyacrylamide gel electrophoresis and staining**

339 Sand fly saliva (10 µg) was run on a 12.5% polyacrylamide gel, before and after deglycosylation  
340 with endoglycosidase PNGase F (New England Biolabs, Massachusetts, US). Gel was stained using  
341 InstantBlue Protein stain (Expedeon, California, US). Spectra Multicolor Broad Range Protein  
342 Ladder (ThermoFisher, UK) was used as molecular weight marker.

343

### 344 **Concanavalin A blots**

345 Saliva samples, before and after treatment with PNGase F (New England Biolabs, US) were run on  
346 a 12.5% polyacrylamide gel under standard conditions, transferred onto a PVDF membrane  
347 (Fisher Scientific, UK), and blocked with 1% BSA (Sigma, St. Louis, US) in PBS-Tw 20 (Sigma, St.  
348 Louis, US) overnight at 4°C. Membrane was incubated with 1 µg/ml biotinylated Concanavalin A  
349 (ConA) lectin (Vector Labs, Peterborough, UK) for 1 hour at room temperature. After washing, the  
350 membrane was incubated with 1:100,000 streptavidin-HRP (Vector Labs, Peterborough, UK).  
351 SuperSignal West Pico Chemiluminescent substrate (ThermoFisher, Massachusetts, US) was used

352 to detect the bands. Egg albumin (Sigma, St. Louis, US), a highly mannosylated *N*-linked  
353 glycoprotein<sup>68</sup>, was used as positive control.

354

### 355 **Mass spectrometry analysis**

356 To identify the glycoproteins that were susceptible to PNGase F, bands of interest were sliced  
357 from the gel and sent to the Dundee University Fingerprints Proteomics Facility. Briefly, the  
358 excised bands were subjected to in-gel trypsination then alkylated with iodoacetamide. The  
359 resultant peptides were then analysed via liquid chromatography- tandem mass spectrometry  
360 (LC-MS/MS) in a Thermo LTQ XL Linear Trap instrument equipped with a nano-LC. Tandem MS  
361 data were searched against the *Lu. longipalpis* database downloaded from VectorBase  
362 (<https://www.vectorbase.org/proteomes>) using the Mascot (version 2.3.02, Matrix Science,  
363 Liverpool) search engine. Search parameters were performed as described in elsewhere<sup>69</sup>. For in-  
364 solution data, the false discovery rate was filtered at 1%, and individual ion scores  $\geq 30$  were  
365 considered to indicate identity or extensive homology ( $p < 0.05$ ).

366

### 367 **Enzymatic release of *N*-linked glycans**

368 The *N*-glycans from sand fly saliva were released by in-gel deglycosylation using PNGase F as  
369 described by Royle *et al.*<sup>70</sup>. For deglycosylation using PNGase A, peptides were released from gel  
370 pieces by overnight incubation at 37 °C with trypsin in 25 mM ammonium bicarbonate. The  
371 supernatant was dried, re-suspended in water and heated at 100 °C for 10 min to deactivate the  
372 trypsin. Samples were dried by vacuum centrifugation and the tryptic peptide mixture was  
373 incubated with PNGase A in 100 mM citrate/phosphate buffer (pH 5.0) for 16 h at 37 °C<sup>71</sup>. Samples  
374 were separated from protein and salts using LudgerClean Protein Binding Plate (Ludger Ltd.,  
375 Oxfordshire, UK). All wells were flushed with extra water to ensure full recovery and then dried  
376 by vacuum centrifugation prior to fluorescent labelling.

377

### 378 **Fluorescent labelling and purification of released *N*-glycans**

379 Released *N*-glycans were fluorescently labelled via reductive amination reaction with  
380 procainamide using a Ludger Procainamide Glycan Labelling Kit containing 2-picoline borane  
381 (Ludger Ltd.). The released glycans were incubated with labelling reagents for 1 h at 65 °C. The  
382 procainamide labelled glycans were cleaned up using LudgerClean S Cartridges (Ludger Ltd) and  
383 eluted with water (1 mL). Samples were evaporated under high vacuum and re-suspended in  
384 water prior to use.

385

### 386 **ESI-LC-MS and ESI-LC-MS/MS analysis of procainamide-labelled *N*-glycans**

387 Procainamide labelled samples were analysed by ESI-LC-MS in positive ion mode. 25  $\mu$ L of each  
388 sample were injected onto an ACQUITY UPLC BEH-Glycan 1.7  $\mu$ m, 2.1 x 150 mm column at 40 °C

389 on the Dionex Ultimate 3000 UHPLC attached to a Bruker Amazon Speed ETD (Bruker, UK). The  
390 running conditions used were: solvent A was 50 mM ammonium formate pH 4.4; solvent B was  
391 acetonitrile (acetonitrile 190 far UV/gradient quality; Romil #H049). Gradient conditions were: 0  
392 to 53.5 min, 24% A (0.4 mL/min); 53.5 to 55.5 min, 24 to 49 % A (0.4 mL/min); 55.5 to 57.5min,  
393 49 to 60% A (0.4 to 0.25 mL/min); 57.5 to 59.5 min, 60% A (0.25 mL/min); 59.5 to 65.5 min, 60 to  
394 24% A (0.4 mL/min); 65.5 to 66.5 min, 24% A (0.25 to 0.4 mL/min); 66.5 to 70 min 24% A (0.4  
395 mL/min). The Amazon Speed settings were the same as described in<sup>72</sup> except that precursor ions  
396 were released after 0.2 min and scanned in enhanced resolution within a mass range of 200-1500  
397 *m/z* (target mass, 900 *m/z*).

398

### 399 **Release of *O*-linked glycans**

400 Saliva samples underwent reductive  $\beta$ -elimination to release *O*-glycans after PNGase F  
401 treatment. Briefly, samples were diluted in 0.05 M sodium hydroxide and 1.0 M sodium  
402 borohydride at a temperature of 45°C with an incubation time of 14-16 h followed by solid-  
403 phase extraction of released *O*-glycans<sup>73</sup>. *O*-glycans were analysed using PGC-LC coupled to  
404 negative ion ESI-MS/MS<sup>74</sup> alongside bovine fetuin *O*-glycans as a positive control.

405

### 406 **MALDI-TOF analysis of aminopyridine-labelled glycans**

407 Sand fly salivary glycans were released according to previous procedures and labelled with PA  
408 (aminopyridine) as described elsewhere<sup>75</sup>, prior to RP-HPLC and analysis by MALDI-TOF MS  
409 using a Bruker Daltonics Autoflex Speed instrument (Hykollari). Aliquots of samples were  
410 treated with Jack bean  $\alpha$ -mannosidase (Sigma),  $\alpha$ -1,3 mannosidase and 48% aqueous  
411 hydrofluoric acid (aq.HF); the latter under control conditions releases phospho(di)esters,  
412 phosphonate,  $\alpha$ 1,3-fucose and galactofuranose groups. Dried glycan fractions were redissolved  
413 in 3  $\mu$ L of aq.HF on ice (in the cold room) for 36 h prior to repeated evaporation. The digests  
414 were re-analysed using MALDI-TOF MS and MS/MS. Spectra were annotated by comparison to  
415 previous data on insect N-glycomes in terms of monosaccharide composition (Fx Hy Nz), using  
416 retention time, manual interpretation, exoglycosidase treatment results and LIFT fragmentation  
417 analysis.

418

419

## 420 References

- 421 1 Maroli, M., Feliciangeli, M. D., Bichaud, L., Charrel, R. N. & Gradoni, L. Phlebotomine  
422 sandflies and the spreading of leishmaniasis and other diseases of public health  
423 concern. *Med Vet Entomol* **27**, 123-147, doi:10.1111/j.1365-2915.2012.01034.x (2013).
- 424 2 Staudacher, E. *et al.* Alpha 1-6(alpha 1-3)-difucosylation of the asparagine-bound N-  
425 acetylglucosamine in honeybee venom phospholipase A2. *Glycoconj J* **9**, 82-85 (1992).
- 426 3 World Health Organization. Control of the leishmaniasis: report of a meeting of the  
427 WHO Expert Committee on the Control of the Leishmaniasis. Report No. 949, (Geneva,  
428 2010).
- 429 4 Abdeladhim, M., Kamhawi, S. & Valenzuela, J. G. What's behind a sand fly bite? The  
430 profound effect of sand fly saliva on host hemostasis, inflammation and immunity.  
431 *Infect Genet Evol* **28**, 691-703, doi:10.1016/j.meegid.2014.07.028 (2014).
- 432 5 Lestina, T., Rohousova, I., Sima, M., de Oliveira, C. I. & Volf, P. Insights into the sand  
433 fly saliva: Blood-feeding and immune interactions between sand flies, hosts, and  
434 *Leishmania*. *PLoS Negl Trop Dis* **11**, e0005600, doi:10.1371/journal.pntd.0005600  
435 (2017).
- 436 6 Rogers, M. E. The role of leishmania proteophosphoglycans in sand fly transmission  
437 and infection of the Mammalian host. *Front Microbiol* **3**, 223,  
438 doi:10.3389/fmicb.2012.00223 (2012).
- 439 7 Mondragon-Shem, K. *et al.* Severity of old world cutaneous leishmaniasis is influenced  
440 by previous exposure to sandfly bites in Saudi Arabia. *PLoS Negl Trop Dis* **9**, e0003449,  
441 doi:10.1371/journal.pntd.0003449 (2015).
- 442 8 Cecilio, P. *et al.* Pre-clinical antigenicity studies of an innovative multivalent vaccine for  
443 human visceral leishmaniasis. *PLoS Negl Trop Dis* **11**, e0005951,  
444 doi:10.1371/journal.pntd.0005951 (2017).
- 445 9 Rudd, P., Elliott, T., Cresswell, P., Wilson, I. & Dwek, R. Glycosylation and the immune  
446 system. *Science* **291** (2001).
- 447 10 Katoh, T. & Tiemeyer, M. The N's and O's of *Drosophila* glycoprotein glycobiology.  
448 *Glycoconj J* **30**, 57-66, doi:10.1007/s10719-012-9442-x (2013).
- 449 11 Rogers, M. E., Ilg, T., Nikolaev, A. V., Ferguson, M. A. & Bates, P. A. Transmission of  
450 cutaneous leishmaniasis by sand flies is enhanced by regurgitation of fPPG. *Nature*  
451 **430**, 463-467, doi:10.1038/nature02675 (2004).
- 452 12 Gomes, R. & Oliveira, F. The immune response to sand fly salivary proteins and its  
453 influence on *Leishmania* immunity. *Front Immunol* **3** (2012).
- 454 13 Abdeladhim, M. *et al.* Updating the salivary gland transcriptome of *Phlebotomus*  
455 *papatasi* (Tunisian strain): the search for sand fly-secreted immunogenic proteins for  
456 humans. *PLoS One* **7**, e47347, doi:10.1371/journal.pone.0047347 (2012).
- 457 14 Hostomska, J. *et al.* Analysis of salivary transcripts and antigens of the sand fly  
458 *Phlebotomus arabicus*. *BMC Genomics* **10**, 282, doi:10.1186/1471-2164-10-282 (2009).
- 459 15 Martin-Martin, I., Molina, R. & Jimenez, M. Identifying salivary antigens of  
460 *Phlebotomus argentipes* by a 2DE approach. *Acta Trop* **126**, 229-239,  
461 doi:10.1016/j.actatropica.2013.02.008 (2013).
- 462 16 Mejia, J. S., Toot-Zimmer, A. L., Schultheiss, P. C., Beaty, B. J. & Titus, R. G. BluePort: a  
463 platform to study the eosinophilic response of mice to the bite of a vector of  
464 *Leishmania* parasites, *Lutzomyia longipalpis* sand flies. *PLoS One* **5**, e13546,  
465 doi:10.1371/journal.pone.0013546 (2010).
- 466 17 Rohousova, I. *et al.* Salivary gland transcriptomes and proteomes of *Phlebotomus tobbi*  
467 and *Phlebotomus sergenti*, vectors of leishmaniasis. *PLoS Negl Trop Dis* **6**, e1660,  
468 doi:10.1371/journal.pntd.0001660 (2012).

- 469 18 Vlkova, M. *et al.* Comparative analysis of salivary gland transcriptomes of *Phlebotomus*  
470 *orientalis* sand flies from endemic and non-endemic foci of visceral leishmaniasis. *PLoS*  
471 *Negl Trop Dis* **8**, e2709, doi:10.1371/journal.pntd.0002709 (2014).
- 472 19 Volf, P., Tesarova, P. & Nohynkova, E. N. Salivary proteins and glycoproteins in  
473 phlebotomine sandflies of various species, sex and age. *Med Vet Entomol* **14**, 251-256  
474 (2000).
- 475 20 Valenzuela, J. G., Garfield, M., Rowton, E. D. & Pham, V. M. Identification of the most  
476 abundant secreted proteins from the salivary glands of the sand fly *Lutzomyia*  
477 *longipalpis*, vector of *Leishmania chagasi*. *J Exp Biol* **207**, 3717-3729,  
478 doi:10.1242/jeb.01185 (2004).
- 479 21 Maupin, K. A., Liden, D. & Haab, B. B. The fine specificity of mannose-binding and  
480 galactose-binding lectins revealed using outlier motif analysis of glycan array data.  
481 *Glycobiology* **22**, 160-169, doi:10.1093/glycob/cwr128 (2012).
- 482 22 Kozak, R. P., Tortosa, C. B., Fernandes, D. L. & Spencer, D. I. Comparison of  
483 procainamide and 2-aminobenzamide labeling for profiling and identification of  
484 glycans by liquid chromatography with fluorescence detection coupled to electrospray  
485 ionization-mass spectrometry. *Anal Biochem* **486**, 38-40, doi:10.1016/j.ab.2015.06.006  
486 (2015).
- 487 23 Wang, T. *et al.* Discovery and characterization of a novel extremely acidic bacterial *N*-  
488 glycanase with combined advantages of PNGase F and A. *Biosci Rep* **34**, e00149,  
489 doi:10.1042/BSR20140148 (2014).
- 490 24 Hansen, J. E. *et al.* NetOglyc: prediction of mucin type O-glycosylation sites based on  
491 sequence context and surface accessibility. *Glycoconj J* **15**, 115-130 (1998).
- 492 25 Sima, M. *et al.* The Diversity of Yellow-Related Proteins in Sand Flies (Diptera:  
493 Psychodidae). *PLoS One* **11**, e0166191, doi:10.1371/journal.pone.0166191 (2016).
- 494 26 Seppo, A. & Tiemeyer, M. Function and structure of *Drosophila* glycans. *Glycobiology*  
495 **10**, 751-760, doi:10.1093/glycob/10.8.751 (2000).
- 496 27 ten Hagen, K. G., Zhang, L., Tian, E. & Zhang, Y. Glycobiology on the fly: developmental  
497 and mechanistic insights from *Drosophila*. *Glycobiology* **19**, 102-111,  
498 doi:10.1093/glycob/cwn096 (2009).
- 499 28 Aoki, K. *et al.* Dynamic developmental elaboration of *N*-linked glycan complexity in the  
500 *Drosophila melanogaster* embryo. *J Biol Chem* **282**, 9127-9142,  
501 doi:10.1074/jbc.M606711200 (2007).
- 502 29 Kurz, S. *et al.* Targeted release and fractionation reveal glucuronylated and sulphated  
503 *N*- and *O*-glycans in larvae of dipteran insects. *J Proteomics* **126**, 172-188,  
504 doi:10.1016/j.jprot.2015.05.030 (2015).
- 505 30 Cabrera, G. *et al.* Structural characterization and biological implications of sulfated *N*-  
506 glycans in a serine protease from the neotropical moth *Hylesia metabus* (Cramer  
507 [1775]) (Lepidoptera: Saturniidae). *Glycobiology* **26**, 230-250,  
508 doi:10.1093/glycob/cwv096 (2016).
- 509 31 Hykollari, A. *et al.* Isomeric separation and recognition of anionic and zwitterionic *N*-  
510 glycans from royal jelly glycoproteins. *Mol Cell Proteomics* **17**, 2177-2196,  
511 doi:10.1074/mcp.RA117.000462 (2018).
- 512 32 Stanton, R. *et al.* The underestimated *N*-glycomes of lepidopteran species. *Biochim*  
513 *Biophys Acta Gen Subj* **1861**, 699-714, doi:10.1016/j.bbagen.2017.01.009 (2017).
- 514 33 Vandenborre, G. *et al.* Diversity in protein glycosylation among insect species. *PLoS one*  
515 **6**, e16682, doi:10.1371/journal.pone.0016682 (2011).
- 516 34 Francischetti, I. M., Valenzuela, J. G., Pham, V. M., Garfield, M. K. & Ribeiro, J. M.  
517 Toward a catalog for the transcripts and proteins (sialome) from the salivary gland of  
518 the malaria vector *Anopheles gambiae*. *J Exp Biol* **205**, 2429-2451 (2002).

- 519 35 Esteves, E. *et al.* Analysis of the salivary gland transcriptome of unfed and partially fed  
520 *Amblyomma sculptum* ticks and descriptive proteome of the saliva. *Front Cell Infect*  
521 *Microbiol* **7**, 476, doi:10.3389/fcimb.2017.00476 (2017).
- 522 36 Myskova, J. *et al.* Characterization of a midgut mucin-like glycoconjugate of *Lutzomyia*  
523 *longipalpis* with a potential role in *Leishmania* attachment. *Parasit Vectors* **9**, 413,  
524 doi:10.1186/s13071-016-1695-y (2016).
- 525 37 Tiemeyer, M., Nakato, H. & Esko, J. D. in *Essentials of Glycobiology* (eds rd *et al.*) 335-  
526 349 (2015).
- 527 38 Nakamura, N., Lyalin, D. & Panin, V. M. Protein O-mannosylation in animal  
528 development and physiology: from human disorders to *Drosophila* phenotypes. *Semin*  
529 *Cell Dev Biol* **21**, 622-630, doi:10.1016/j.semcd.2010.03.010 (2010).
- 530 39 Staudacher, E. Mucin-Type O-Glycosylation in Invertebrates. *Molecules* **20**, 10622-  
531 10640, doi:10.3390/molecules200610622 (2015).
- 532 40 Piacente, F. *et al.* Giant DNA virus mimivirus encodes pathway for biosynthesis of  
533 unusual sugar 4-amino-4,6-dideoxy-D-glucose (Viosamine). *J Biol Chem* **287**, 3009-  
534 3018, doi:10.1074/jbc.M111.314559 (2012).
- 535 41 Thomas, R. M. *et al.* Glycosylation of DsbA in *Francisella tularensis* subsp. *tularensis*. *J*  
536 *Bacteriol* **193**, 5498-5509, doi:10.1128/JB.00438-11 (2011).
- 537 42 Black, G. E., Fox, A., Fox, K., Snyder, A. P. & Smith, P. B. Electrospray tandem mass  
538 spectrometry for analysis of native muramic acid in whole bacterial cell hydrolysates.  
539 *Anal Chem* **66**, 4171-4176, doi:10.1021/ac00095a010 (1994).
- 540 43 Yaphe, W. Colorimetric Determination of 3,6-Anhydrogalactose with the Indolyl-3-  
541 acetic Acid Reagent. *Nature* **197**, 488-489 (1963).
- 542 44 Hykollari, A., Malzl, D., Stanton, R., Eckmair, B. & Paschinger, K. Tissue-specific  
543 glycosylation in the honeybee: Analysis of the N-glycomes of *Apis mellifera* larvae and  
544 venom. *Biochim Biophys Acta Gen Subj* **1863**, 129409,  
545 doi:10.1016/j.bbagen.2019.08.002 (2019).
- 546 45 Valenzuela, J. G., Belkaid, Y., Rowton, E. & Ribeiro, J. M. The salivary apyrase of the  
547 blood-sucking sand fly *Phlebotomus papatasi* belongs to the novel *Cimex* family of  
548 apyrases. *J Exp Biol* **204**, 229-237 (2001).
- 549 46 Charlab, R., Valenzuela, J. G., Rowton, E. D. & Ribeiro, J. M. Toward an understanding  
550 of the biochemical and pharmacological complexity of the saliva of a hematophagous  
551 sand fly *Lutzomyia longipalpis*. *Proc Natl Acad Sci U S A* **96**, 15155-15160,  
552 doi:10.1073/pnas.96.26.15155 (1999).
- 553 47 Rabouille, C. Pathways of Unconventional Protein Secretion. *Trends Cell Biol* **27**, 230-  
554 240, doi:10.1016/j.tcb.2016.11.007 (2017).
- 555 48 Nickel, W. & Rabouille, C. Mechanisms of regulated unconventional protein secretion.  
556 *Nat Rev Mol Cell Biol* **10**, 148-155, doi:10.1038/nrm2617 (2009).
- 557 49 Ribeiro, J. M., Zeidner, N. S., Ledin, K., Dolan, M. C. & Mather, T. N. How much  
558 pilocarpine contaminates pilocarpine-induced tick saliva? *Med Vet Entomol* **18**, 20-24,  
559 doi:10.1111/j.0269-283x.2003.0469.x (2004).
- 560 50 Oliveira, C. J. *et al.* Proteome of *Rhipicephalus sanguineus* tick saliva induced by the  
561 secretagogues pilocarpine and dopamine. *Ticks Tick Borne Dis* **4**, 469-477,  
562 doi:10.1016/j.ttbdis.2013.05.001 (2013).
- 563 51 Boorman, J. Induction of salivation in biting midges and mosquitoes, and  
564 demonstration of virus in the saliva of infected insects. *Med Vet Entomol* **1**, 211-214,  
565 doi:10.1111/j.1365-2915.1987.tb00346.x (1987).
- 566 52 Taylor, P. R. *et al.* Macrophage receptors and immune recognition. *Annu Rev Immunol*  
567 **23**, 901-944, doi:10.1146/annurev.immunol.23.021704.115816 (2005).
- 568 53 Schnaar, R. L. Glycobiology simplified: diverse roles of glycan recognition in  
569 inflammation. *J Leukoc Biol* **99**, 825-838, doi:10.1189/jlb.3RI0116-021R (2016).



- 570 54 Schuijt, T. J. *et al.* A tick mannose-binding lectin inhibitor interferes with the vertebrate  
571 complement cascade to enhance transmission of the lyme disease agent. *Cell Host*  
572 *Microbe* **10**, 136-146, doi:10.1016/j.chom.2011.06.010 (2011).
- 573 55 Liu, D. & Uzonna, J. The early interaction of *Leishmania* with macrophages and  
574 dendritic cells and its influence on the host immune response. *Front Cell Infect*  
575 *Microbiol* **2** (2012).
- 576 56 Theodos, C. M. & Titus, R. G. Salivary-Gland Material from the Sand Fly *Lutzomyia*-  
577 *Longipalpis* Has an Inhibitory Effect on Macrophage Function in-Vitro. *Parasite*  
578 *Immunology* **15**, 481-487, doi:DOI 10.1111/j.1365-3024.1993.tb00634.x (1993).
- 579 57 Hall, L. R. & Titus, R. G. Sand fly vector saliva selectively modulates macrophage  
580 functions that inhibit killing of *Leishmania* production. *The Journal of Immunology* **155**,  
581 3501-3506 (1995).
- 582 58 Lee, S. H. *et al.* Mannose receptor high, M2 dermal macrophages mediate nonhealing  
583 *Leishmania major* infection in a Th1 immune environment. *J Exp Med* **215**, 357-375,  
584 doi:10.1084/jem.20171389 (2018).
- 585 59 Caparros, E. *et al.* Role of the C-type lectins DC-SIGN and L-SIGN in *Leishmania*  
586 interaction with host phagocytes. *Immunobiology* **210**, 185-193,  
587 doi:10.1016/j.imbio.2005.05.013 (2005).
- 588 60 Hamasaki, R., Kato, H., Terayama, Y., Iwata, H. & Valenzuela, J. G. Functional  
589 characterization of a salivary apyrase from the sand fly, *Phlebotomus duboscqi*, a  
590 vector of *Leishmania major*. *J Insect Physiol* **55**, 1044-1049,  
591 doi:10.1016/j.jinsphys.2009.07.010 (2009).
- 592 61 Cavalcante, R., Pereira, M., Freitas, J. & de F Gontijo, N. Ingestion of saliva during  
593 carbohydrate feeding by *Lutzomyia longipalpis* (Diptera; Psychodidae). *Mem Inst*  
594 *Oswaldo Cruz* **10** (2006).
- 595 62 Lannoo, N. & Van Damme, E. J. Lectin domains at the frontiers of plant defense. *Front*  
596 *Plant Sci* **5**, 397, doi:10.3389/fpls.2014.00397 (2014).
- 597 63 Zhu-Salzman, K. & Zeng, R. Insect response to plant defensive protease inhibitors.  
598 *Annu Rev Entomol* **60**, 233-252, doi:10.1146/annurev-ento-010814-020816 (2015).
- 599 64 Charlab, R. & Ribeiro, J. M. Cytostatic effect of *Lutzomyia longipalpis* salivary gland  
600 homogenates on *Leishmania* parasites. *Am J Trop Med Hyg* **48**, 831-838 (1993).
- 601 65 Gupta, R., Jung, E. & Brunak, S. *NetNGlyc 1.0 Server*,  
602 <<http://www.cbs.dtu.dk/services/NetNGlyc/>> (2017).
- 603 66 Steentoft, C. *et al.* (DTU Bioinformatics. Department of Bio and Health Informatics,  
604 2017).
- 605 67 Almagro Armenteros, J. J., Sonderby, C. K., Sonderby, S. K., Nielsen, H. & Winther, O.  
606 DeepLoc: prediction of protein subcellular localization using deep learning.  
607 *Bioinformatics* **33**, 3387-3395, doi:10.1093/bioinformatics/btx431 (2017).
- 608 68 Harvey, D. J., Wing, D. R., Kuster, B. & Wilson, I. B. Composition of N-linked  
609 carbohydrates from ovalbumin and co-purified glycoproteins. *J Am Soc Mass Spectrom*  
610 **11**, 564-571, doi:10.1016/S1044-0305(00)00122-7 (2000).
- 611 69 Rose, C. *et al.* An investigation into the protein composition of the teneral *Glossina*  
612 *morsitans morsitans* peritrophic matrix. *PLoS Negl Trop Dis* **8**, e2691,  
613 doi:10.1371/journal.pntd.0002691 (2014).
- 614 70 Royle, L., Radcliffe, C. M., Dwek, R. A. & Rudd, P. M. Detailed structural analysis of N-  
615 glycans released from glycoproteins in SDS-PAGE gel bands using HPLC combined with  
616 exoglycosidase array digestions. *Methods Mol Biol* **347**, 125-143, doi:10.1385/1-59745-  
617 167-3:125 (2006).
- 618 71 Navazio, L. *et al.* Monitoring endoplasmic reticulum-to-Golgi traffic of a plant  
619 calreticulin by protein glycosylation analysis. *Biochemistry* **41**, 14141-14149,  
620 doi:10.1021/bi0204701 (2002).

- 621 72 Kotsias, M. *et al.* Method comparison for N-glycan profiling: Towards the  
622 standardization of glycoanalytical technologies for cell line analysis. *PLoS One* **14**,  
623 e0223270, doi:10.1371/journal.pone.0223270 (2019).  
624 73 Carlson, D. M. Structures and immunochemical properties of oligosaccharides isolated  
625 from pig submaxillary mucins. *J Biol Chem* **243**, 616-626 (1968).  
626 74 Jensen, P. H., Karlsson, N. G., Kolarich, D. & Packer, N. H. Structural analysis of N- and  
627 O-glycans released from glycoproteins. *Nat Protoc* **7**, 1299-1310,  
628 doi:10.1038/nprot.2012.063 (2012).  
629 75 Paschinger, K. *et al.* The N-glycans of *Trichomonas vaginalis* contain variable core and  
630 antennal modifications. *Glycobiology* **22**, 300-313, doi:10.1093/glycob/cwr149 (2012).

631

## 632 Acknowledgements

633 This work was supported in part by a Ph.D. studentship by the Colombian Department of  
634 Science, Technology and Innovation (Colciencias) through the scholarship programme  
635 “Francisco José de Caldas” (to KMS) and by the GlycoPar Marie Curie Initial Training Network GA  
636 608295 (to KWK, DS, IW and AA-S). The Biotechnology and Biological Sciences Research Council  
637 supported MER through a David Phillips Fellowship (BB/H022406/1). The funders had no role in  
638 study design, data collection and analysis, decision to publish, or preparation of the manuscript.  
639 We thank Douglas Lamont (Dundee University Fingerprints Facility) for assistance with  
640 proteomics identification of sand fly salivary proteins.

641

## 642 Author contributions

643 Designed experiments (KMS, KWK, DS, AA-S), performed experiments (KMS, KWK, SY, RK) and  
644 analysed the data (KMS, KWK, SY, IW, KP, RK, MER, AA-S), wrote the manuscript (KMS, KWK, AA-  
645 S). All authors reviewed and approved the manuscript.

646

## 647 Additional information

### 648 Competing financial interests

649 The authors declare no competing financial interests.

650

## 651 FIGURE LEGENDS

652 **Figure 1.** Enzymatic cleavage of *Lu. longipalpis* salivary glycoproteins with PNGase F. 10 µg of  
653 salivary proteins were incubated overnight with (+) and without (-) PNGase F to cleave N-  
654 glycans. Samples were resolved on a 12 % SDS-PAGE gel and Coomassie-stained. Egg albumin  
655 (OVA) was used as a positive control. MWM, molecular weight marker. \*PNGase F enzyme.

656 **Figure 2.** HILIC-LC separation of procainamide labelled N-glycans from *Lu. longipalpis*. Sand fly  
657 saliva contains mainly oligomannose-type N-linked glycans, with Man<sub>5</sub>GlcNAc<sub>2</sub> being the most

658 abundant structure. Green circle, mannose; yellow circle, galactose; Blue square, N-  
659 Acetylglucosamine; red triangle, fucose; Proc, procainamide.

660 **Figure 3.** Mass spectrometry analysis of released *N*-glycans from *Lu. longipalpis* salivary  
661 glycoproteins. (A) Positive-ion mass spectrum profile ( $m/z$  540-1,500) of total *N*-glycans. Ion  
662 signals are labelled accordingly. The most abundant glycan species (Hex<sub>5</sub>HexNAc<sub>2</sub>-Proc) was  
663 also detected as an [M+H]<sup>2+</sup> ion with a  $m/z$  of 727.82. See Table 1 for complete glycan  
664 assignment. Peaks labelled with an asterisk correspond to glucose homopolymer contaminants  
665 from HILIC. (B) Positive-ion MS/MS fragmentation spectrum for most abundant  $m/z$  [727.8]<sup>2+</sup>  
666 corresponding to the composition Hex<sub>5</sub>HexNAc<sub>2</sub>-Proc, proposed as a Man<sub>5</sub>GlcNAc<sub>2</sub>. Green  
667 circle, mannose; Blue square, N-Acetylglucosamine; Proc, procainamide.

668 **Figure 4.** Analysis of sand fly *N*-glycans with an unknown residue. Two late-eluting RP-amide  
669 fractions (13 and 14 GU) containing glycans of  $m/z$  1133, 1295 and 1457 (A, D) were analysed by  
670 MALDI-TOF MS and MS/MS before and after jack bean  $\alpha$ -mannosidase (B, E) or hydrofluoric  
671 acid (C, F) treatments. The  $m/z$  1295 glycan structures lost either two or three mannose  
672 residues after mannosidase treatment, ruling out that terminal  $\alpha$ -mannose residues are  
673 substituted, but indicating a difference in the isomeric structure. In contrast, upon hydrofluoric  
674 acid treatment, incomplete loss of 144 Da was observed. Changes in mass upon mannosidase or  
675 HF treatment are indicated and non-glycan impurities annotated with an asterisk. The MS/MS  
676 for the original glycans and their digestion products are shown on the right; the differences in  
677 relative intensity of the  $m/z$  665 and 827 fragments could explain the isomeric  $m/z$  1295  
678 structures with the 144 Da moiety attached to different mannose residues (as shown in panels  
679 A and D); key fragments are annotated according to the Symbolic Nomenclature for Glycans,  
680 while loss of reducing terminal GlcNAc-PA is indicated by -299 Da. PA, 2-aminopyridine; GU,  
681 glucose units; green circle, mannose; blue square, N-Acetylglucosamine.

682

## 683 TABLES

684 **Table 1.** List of glycan structures present in *Lu. longipalpis* saliva. GU, glucose unit; Proc,  
685 procainamide. Green circles, mannose; Blue squares, N-Acetylglucosamine; Red triangle, fucose;  
686 yellow circles, galactose.

687 **Table 2.** Summary of treatments of the isomeric structures detected by MALDI-TOF-MS (Fig 4).  
688 JBMann, Jack Bean  $\alpha$ -mannosidase; GU, glucose units; RT, retention time; aq.HF, aqueous  
689 Hydrofluoric acid.

690

691
